# Supplementary material
Source: PubMed Central journal article supplement (PMC5860562)
Supplement: kwx047whitakerwebmaterial.pdf [file kwx047whitakerwebmaterial.pdf]

## WEB MATERIAL

Web Table 1. Major Experiences of Discrimination and Everyday Discrimination Scales

| Scale                                                  | Range | Modeled                                                                                                                   | Items                                                                                                                                                                                                                                                                                                                                                                                                                                                                                                                                                                            |
|--------------------------------------------------------|-------|---------------------------------------------------------------------------------------------------------------------------|----------------------------------------------------------------------------------------------------------------------------------------------------------------------------------------------------------------------------------------------------------------------------------------------------------------------------------------------------------------------------------------------------------------------------------------------------------------------------------------------------------------------------------------------------------------------------------|
| <b>Major Experiences of Discrimination<sup>a</sup></b> | 0-6   | Continuous<br>Categorical: 0, 1, $\geq 2$                                                                                 | <ol style="list-style-type: none"> <li>1. Being fired or denied a promotion</li> <li>2. Not hired for a job</li> <li>3. Unfair treatment by the police</li> <li>4. Discouraged by a teacher or advisor from continuing one's education</li> <li>5. Prevented from moving into a neighborhood by a landlord or realtor</li> <li>6. Having life made difficult by neighbors</li> </ol>                                                                                                                                                                                             |
| <b>Everyday Discrimination</b>                         | 1-6   | Continuous<br>Categorical: none (score = 1),<br>low (score >1 and <1.5),<br>moderate (score 1.5-2), or high<br>(score >2) | <ol style="list-style-type: none"> <li>1. You are treated with less courtesy than other people</li> <li>2. You are treated with less respect than other people</li> <li>3. You receive poorer service than other people at restaurants or stores</li> <li>4. People act as if they think you are not smart</li> <li>5. People act as if they are afraid of you</li> <li>6. People act as if they think you are dishonest</li> <li>7. People act as if they're better than you</li> <li>8. You are called names or insulted</li> <li>9. You are threatened or harassed</li> </ol> |

<sup>a</sup>If participants answered 'yes' to any of the situations on the major experiences of discrimination scale, they were asked to indicate why they believed they were treated unfairly (race/ethnicity, gender, age, religion, physical appearance, sexual orientation, income level/social class or other).

Web Table 2: Associations of Major Experiences of Discrimination Attributed to Race/Ethnicity and Risk of Incident Type 2 Diabetes, by Race/Ethnicity Group, The Multi-Ethnic Study of Atherosclerosis (MESA) 2000-2013

| Risk of Diabetes            | Number of Experiences of Race/Ethnicity Discrimination |      |            |       |      |          |       |      |            |       |      |            |
|-----------------------------|--------------------------------------------------------|------|------------|-------|------|----------|-------|------|------------|-------|------|------------|
|                             | Continuous <sup>a</sup>                                |      |            | None  |      |          | One   |      |            | ≥ Two |      |            |
|                             | No.                                                    | HR   | 95% CI     | No.   | HR   | 95% CI   | No.   | HR   | 95% CI     | No.   | HR   | 95% CI     |
| <b>African American</b>     |                                                        |      |            |       |      |          |       |      |            |       |      |            |
| N at risk                   | 1,300                                                  |      |            | 718   |      |          | 297   |      |            | 285   |      |            |
| N events                    | 189                                                    |      |            | 105   |      |          | 42    |      |            | 42    |      |            |
| Person-years                | 9,537                                                  |      |            | 5,143 |      |          | 2,222 |      |            | 2,171 |      |            |
| Incidence rate <sup>b</sup> |                                                        | 19.8 |            |       | 20.4 |          |       | 18.9 |            |       | 19.3 |            |
| Model <sup>c</sup>          |                                                        |      |            |       |      |          |       |      |            |       |      |            |
| Model 1                     |                                                        | 0.98 | 0.85, 1.12 |       | 1.00 | Referent |       | 0.95 | 0.65, 1.37 |       | 1.01 | 0.69, 1.49 |
| Model 2                     |                                                        | 0.98 | 0.85, 1.13 |       | 1.00 | Referent |       | 0.93 | 0.63, 1.35 |       | 1.03 | 0.69, 1.53 |
| Model 3                     |                                                        | 0.95 | 0.82, 1.10 |       | 1.00 | Referent |       | 0.87 | 0.58, 1.30 |       | 0.93 | 0.61, 1.43 |
| Model 4                     |                                                        | 0.94 | 0.81, 1.10 |       | 1.00 | Referent |       | 0.82 | 0.54, 1.24 |       | 0.92 | 0.60, 1.41 |
| <b>Chinese</b>              |                                                        |      |            |       |      |          |       |      |            |       |      |            |
| N at risk                   | 641                                                    |      |            | 565   |      |          | 55    |      |            | 21    |      |            |
| N events                    | 80                                                     |      |            | 69    |      |          | 5     |      |            | 6     |      |            |
| Person-years                | 4,969                                                  |      |            | 4,321 |      |          | 482   |      |            | 166   |      |            |
| Incidence rate <sup>b</sup> |                                                        | 16.1 |            |       | 16.0 |          |       | 10.4 |            |       | 36.1 |            |
| Model <sup>c</sup>          |                                                        |      |            |       |      |          |       |      |            |       |      |            |
| Model 1                     |                                                        | 1.37 | 0.93, 2.02 |       | 1.00 | Referent |       | 0.72 | 0.28, 1.83 |       | 2.64 | 1.10, 6.35 |
| Model 2                     |                                                        | 1.40 | 0.94, 2.10 |       | 1.00 | Referent |       | 0.73 | 0.29, 1.85 |       | 2.73 | 1.12, 6.64 |
| Model 3                     |                                                        | 1.53 | 1.00, 2.35 |       | 1.00 | Referent |       | 0.71 | 0.27, 1.85 |       | 3.05 | 1.23, 7.56 |
| Model 4                     |                                                        | 1.27 | 0.80, 2.01 |       | 1.00 | Referent |       | 0.62 | 0.23, 1.65 |       | 1.96 | 0.73, 5.27 |
| <b>Hispanic</b>             |                                                        |      |            |       |      |          |       |      |            |       |      |            |
| N at risk                   | 1,103                                                  |      |            | 880   |      |          | 145   |      |            | 78    |      |            |
| N events                    | 179                                                    |      |            | 132   |      |          | 31    |      |            | 16    |      |            |
| Person-years                | 8,251                                                  |      |            | 6,613 |      |          | 1,055 |      |            | 584   |      |            |
| Incidence rate <sup>b</sup> |                                                        | 21.7 |            |       | 20.0 |          |       | 29.4 |            |       | 27.4 |            |
| Model <sup>c</sup>          |                                                        |      |            |       |      |          |       |      |            |       |      |            |
| Model 1                     |                                                        | 1.18 | 0.98, 1.43 |       | 1.00 | Referent |       | 1.48 | 0.99, 2.20 |       | 1.52 | 0.89, 2.59 |
| Model 2                     |                                                        | 1.19 | 0.98, 1.44 |       | 1.00 | Referent |       | 1.47 | 0.99, 2.19 |       | 1.55 | 0.90, 2.67 |
| Model 3                     |                                                        | 1.22 | 1.00, 1.47 |       | 1.00 | Referent |       | 1.50 | 1.00, 2.26 |       | 1.68 | 0.97, 2.91 |
| Model 4                     |                                                        | 1.19 | 0.97, 1.45 |       | 1.00 | Referent |       | 1.48 | 0.98, 2.23 |       | 1.52 | 0.87, 2.67 |

| Risk of Diabetes            | Number of Experiences of Race/Ethnicity Discrimination |      |            |        |      |          |     |      |            |       |      |             |
|-----------------------------|--------------------------------------------------------|------|------------|--------|------|----------|-----|------|------------|-------|------|-------------|
|                             | Continuous <sup>a</sup>                                |      |            | None   |      |          | One |      |            | ≥ Two |      |             |
|                             | No.                                                    | HR   | 95% CI     | No.    | HR   | 95% CI   | No. | HR   | 95% CI     | No.   | HR   | 95% CI      |
| <b>Non-Hispanic white</b>   |                                                        |      |            |        |      |          |     |      |            |       |      |             |
| N at risk                   | 2,266                                                  |      |            | 2,174  |      |          | 84  |      |            | 8     |      |             |
| N events                    | 206                                                    |      |            | 190    |      |          | 14  |      |            | 2     |      |             |
| Person-years                | 17,799                                                 |      |            | 17,086 |      |          | 646 |      |            | 68    |      |             |
| Incidence rate <sup>b</sup> |                                                        | 11.6 |            |        | 11.1 |          |     | 21.7 |            |       | 29.4 |             |
| Model <sup>c</sup>          |                                                        |      |            |        |      |          |     |      |            |       |      |             |
| Model 1                     |                                                        | 2.07 | 1.36, 3.13 |        | 1.00 | Referent |     | 2.35 | 1.35, 4.07 |       | 3.55 | 0.87, 14.45 |
| Model 2                     |                                                        | 1.83 | 1.19, 2.82 |        | 1.00 | Referent |     | 2.01 | 1.13, 3.57 |       | 2.94 | 0.71, 12.10 |
| Model 3                     |                                                        | 1.91 | 1.24, 2.95 |        | 1.00 | Referent |     | 2.07 | 1.15, 3.71 |       | 3.72 | 0.90, 15.39 |
| Model 4                     |                                                        | 1.68 | 1.09, 2.58 |        | 1.00 | Referent |     | 1.98 | 1.10, 3.57 |       | 2.20 | 0.52, 9.39  |

Abbreviations: No., number; HR, hazard ratio; CI, confidence interval

<sup>a</sup>Continuous variable for the number of items selected on the Major Experiences of Discrimination Scale that were attributed to race/ethnicity, with values ranging from 0-6.

<sup>b</sup>Values are expressed as incidence rate per 1,000 person-years.

<sup>c</sup>Model 1 included covariates for age, gender, race/ethnicity, marital status, family income, education, and study field center. Model 2 additionally adjusted for depressive symptoms and chronic stress burden. Model 3 additionally adjusted for alcohol use, smoking status, moderate and vigorous physical activity and diet quality. Model 4 additionally adjusted for BMI and waist circumference.
